# Supplementary material for: Mobilome-driven segregation of the resistome in biological wastewater treatment
Source: eLife journal article supplement (doi:10.7554/elife.81196), 2022-09-16
Supplement: supp [file elife-81196-supp-v1.zip]

**a**

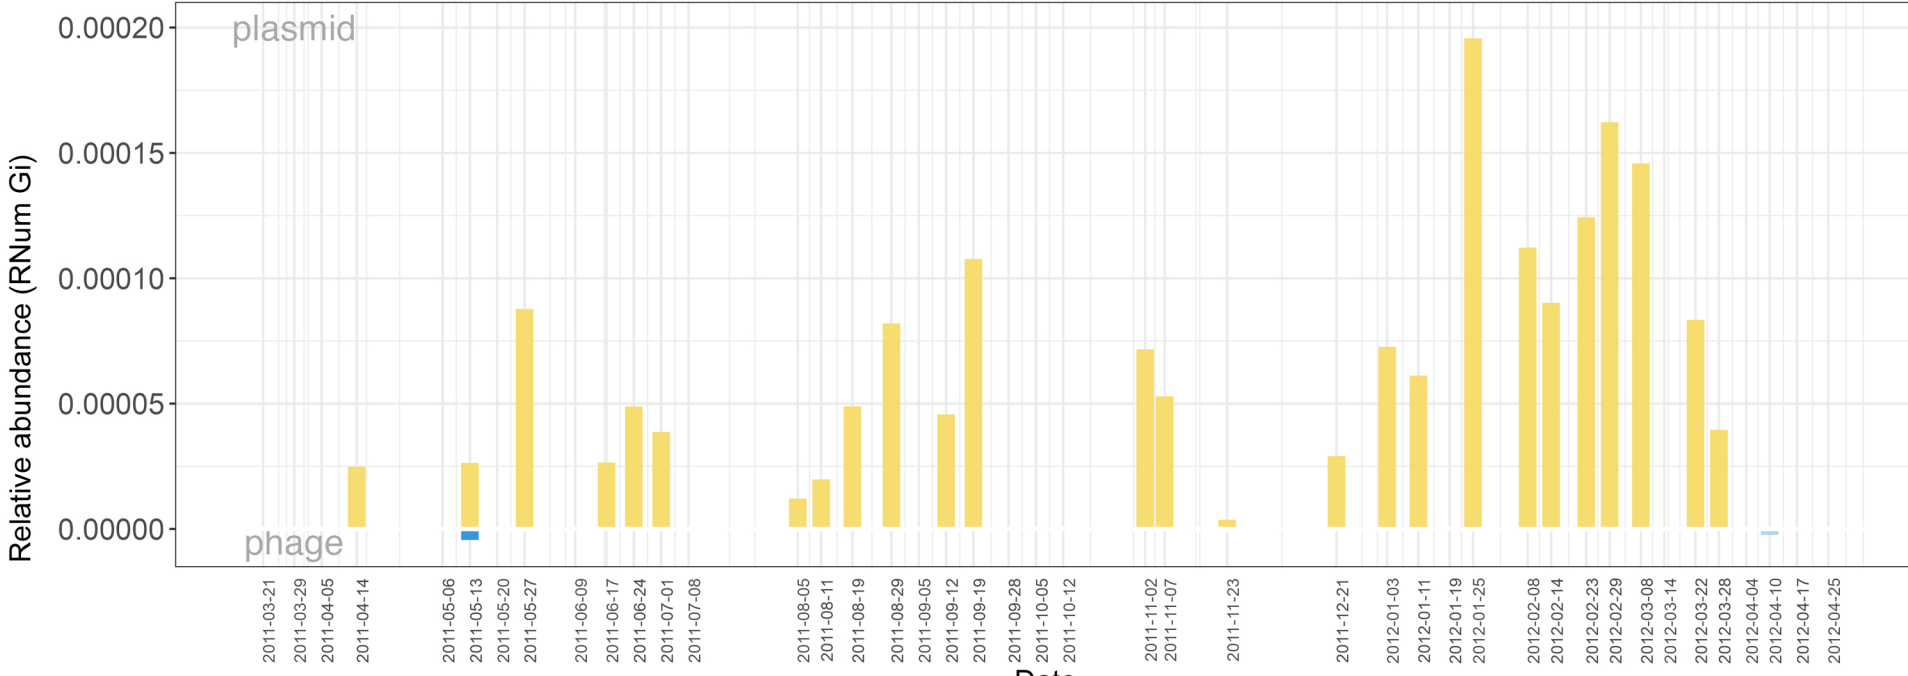

**AMR category**

■ aminoglycoside ■ MLS ■ peptide

2

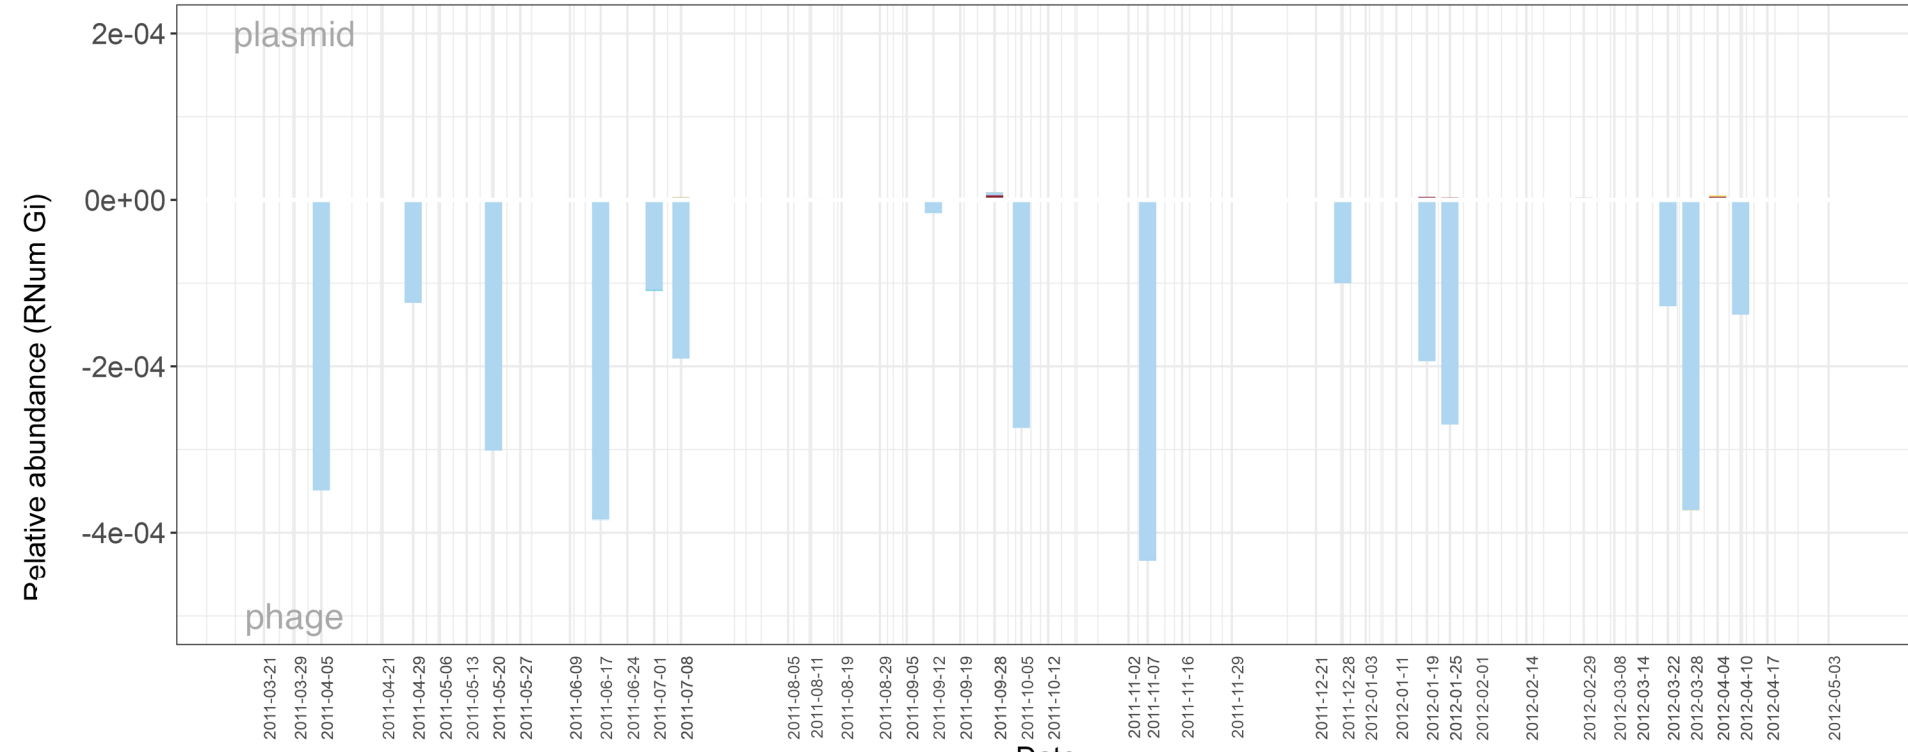

**AMR category**

|                |            |             |
|----------------|------------|-------------|
| aminoglycoside | fosfomycin | peptide     |
| bacitracin     | MLS        | sulfonamide |
