# Supplementary figures and images for: Mobilome-driven segregation of the resistome in biological wastewater treatment
Source: eLife journal article supplement (doi:10.7554/elife.81196), 2022-09-16

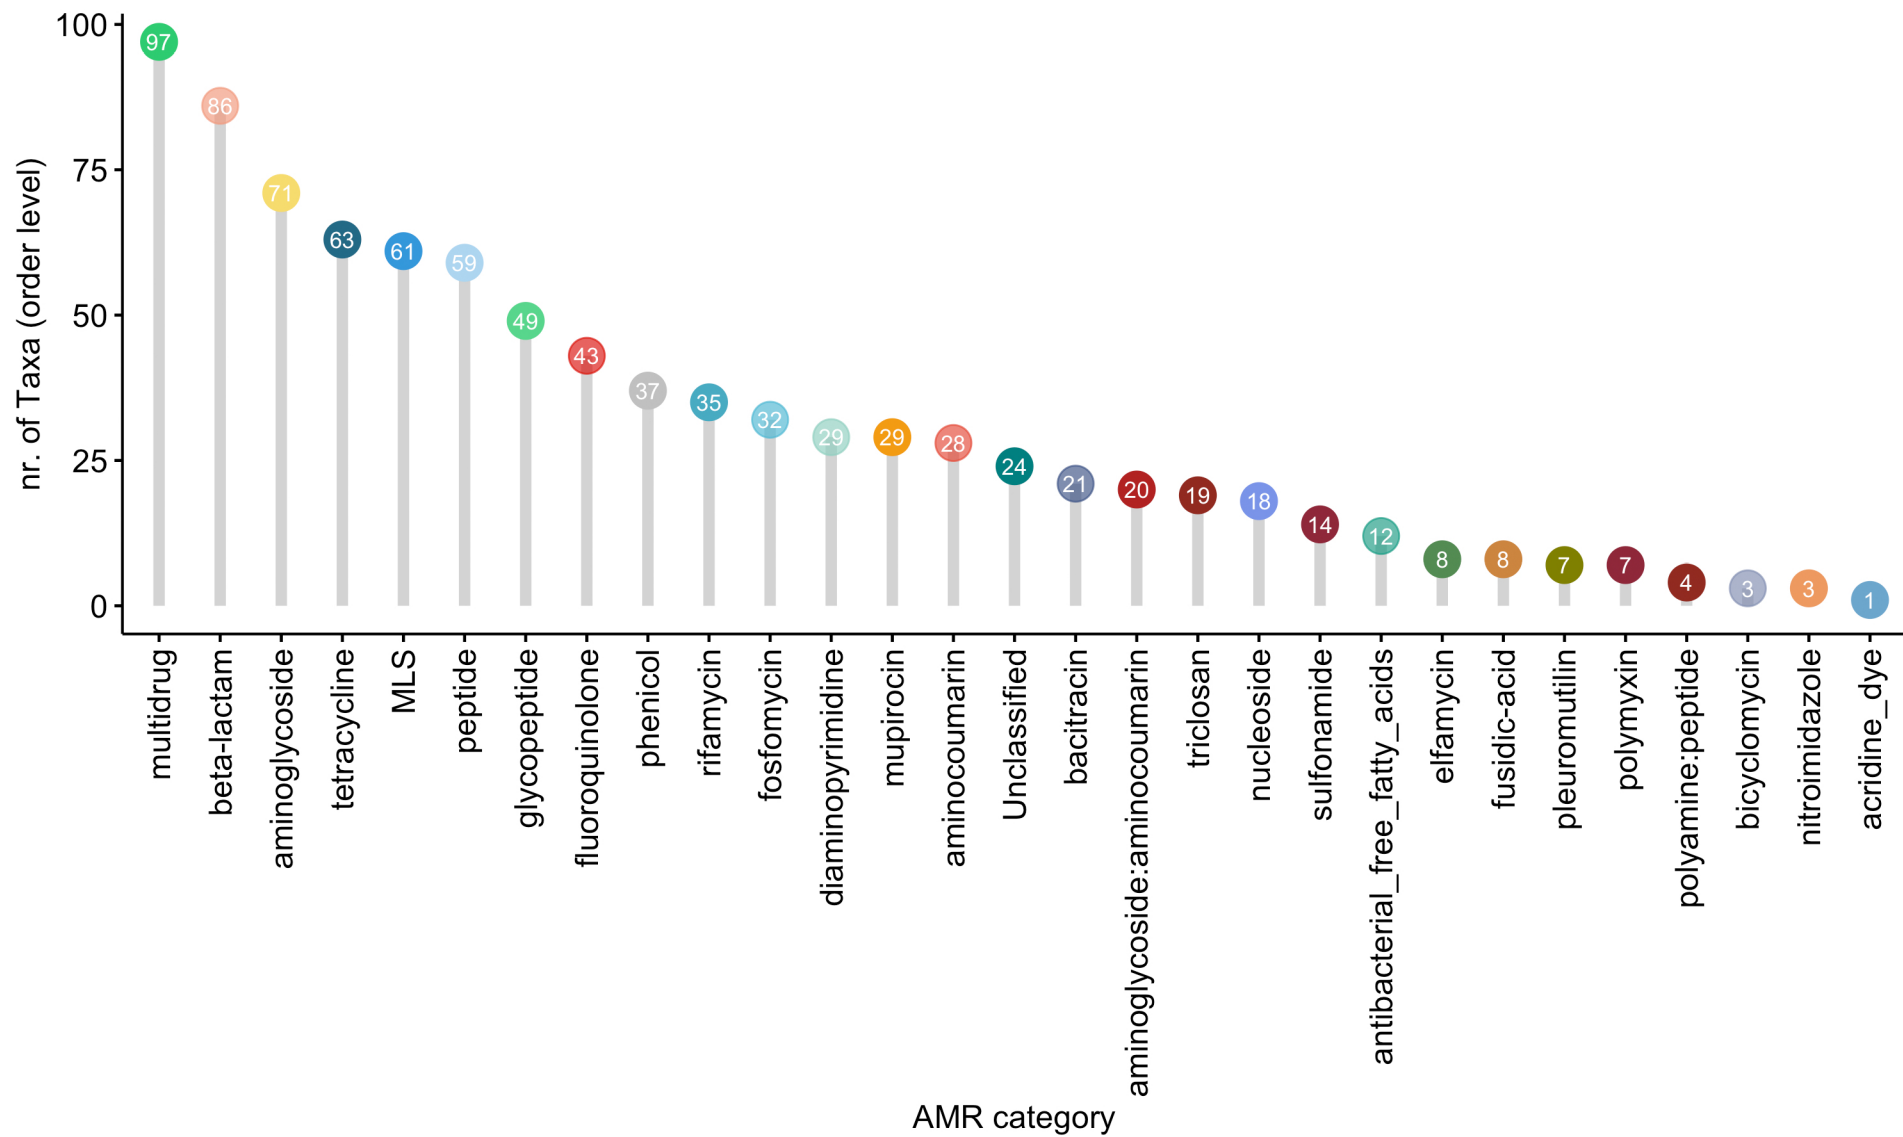

Supplement: supp [file elife-81196-supp-v1.zip]

### Niche size

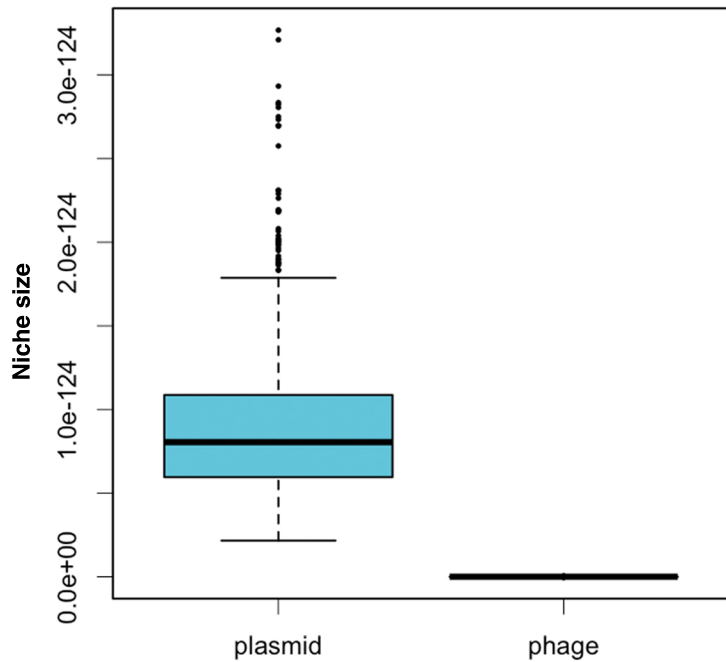

### Niche plot: aminoglycoside

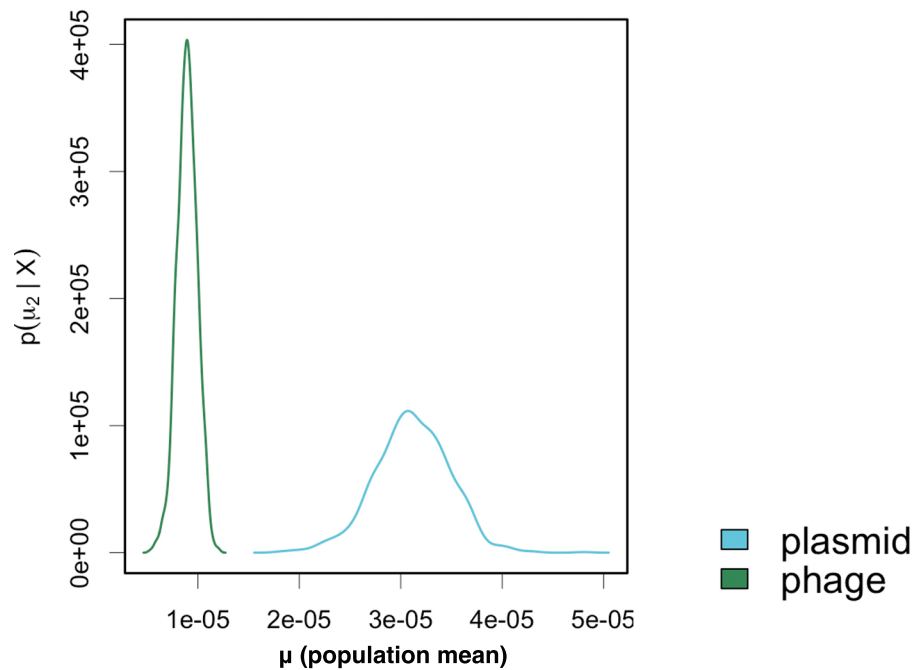

Supplement: supp [file elife-81196-supp-v1.zip]

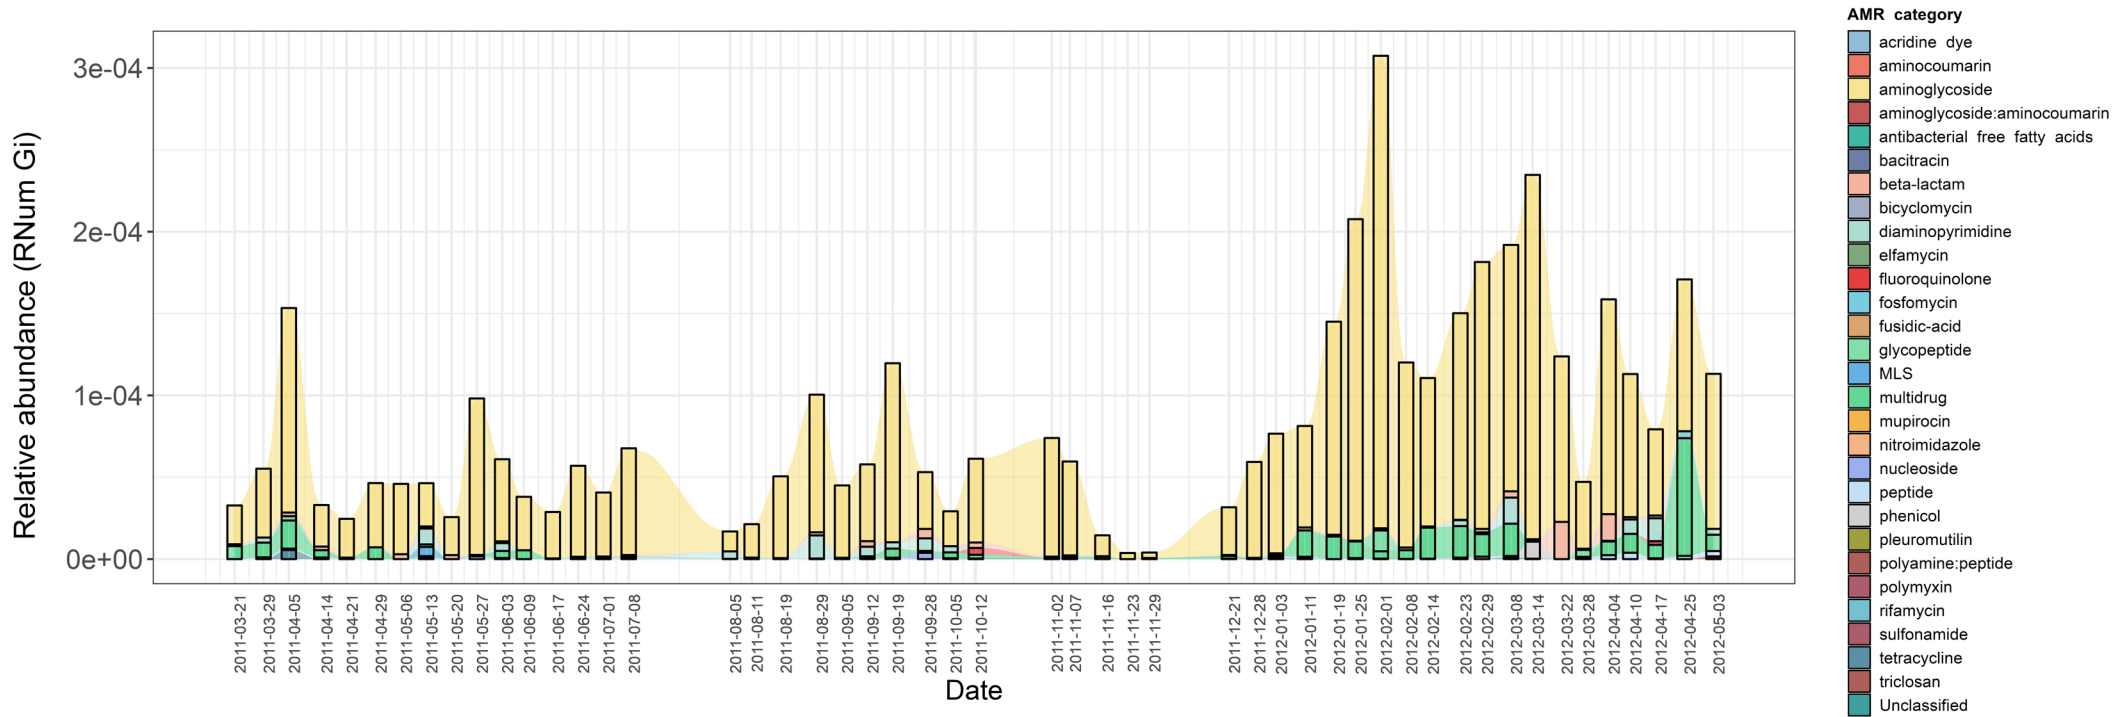

Supplement: supp [file elife-81196-supp-v1.zip]

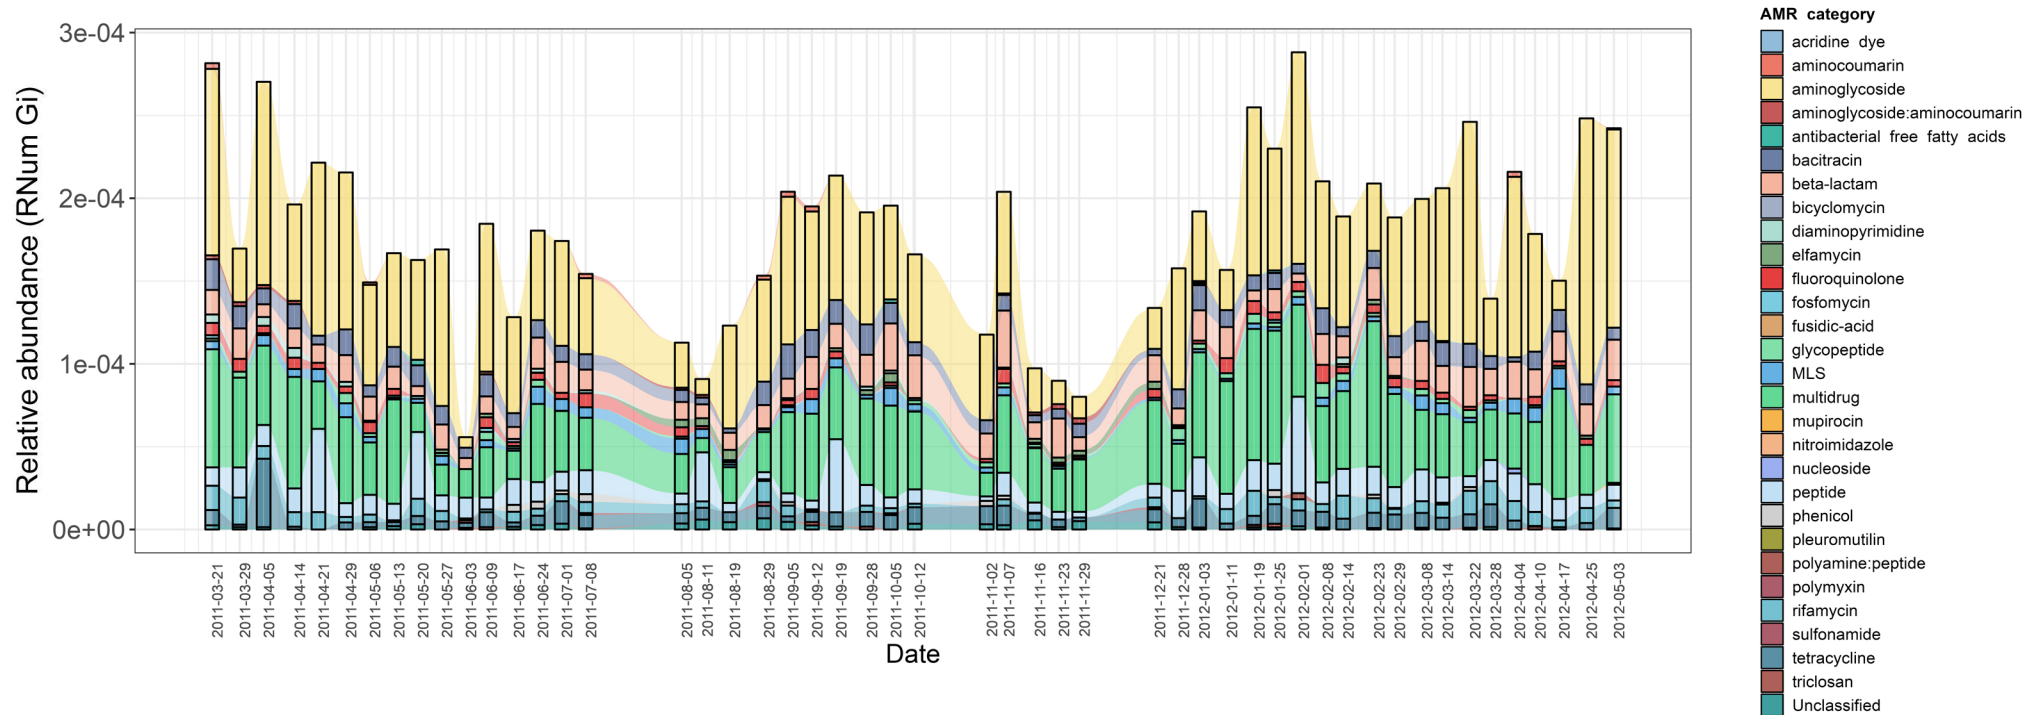

Supplement: supp [file elife-81196-supp-v1.zip]

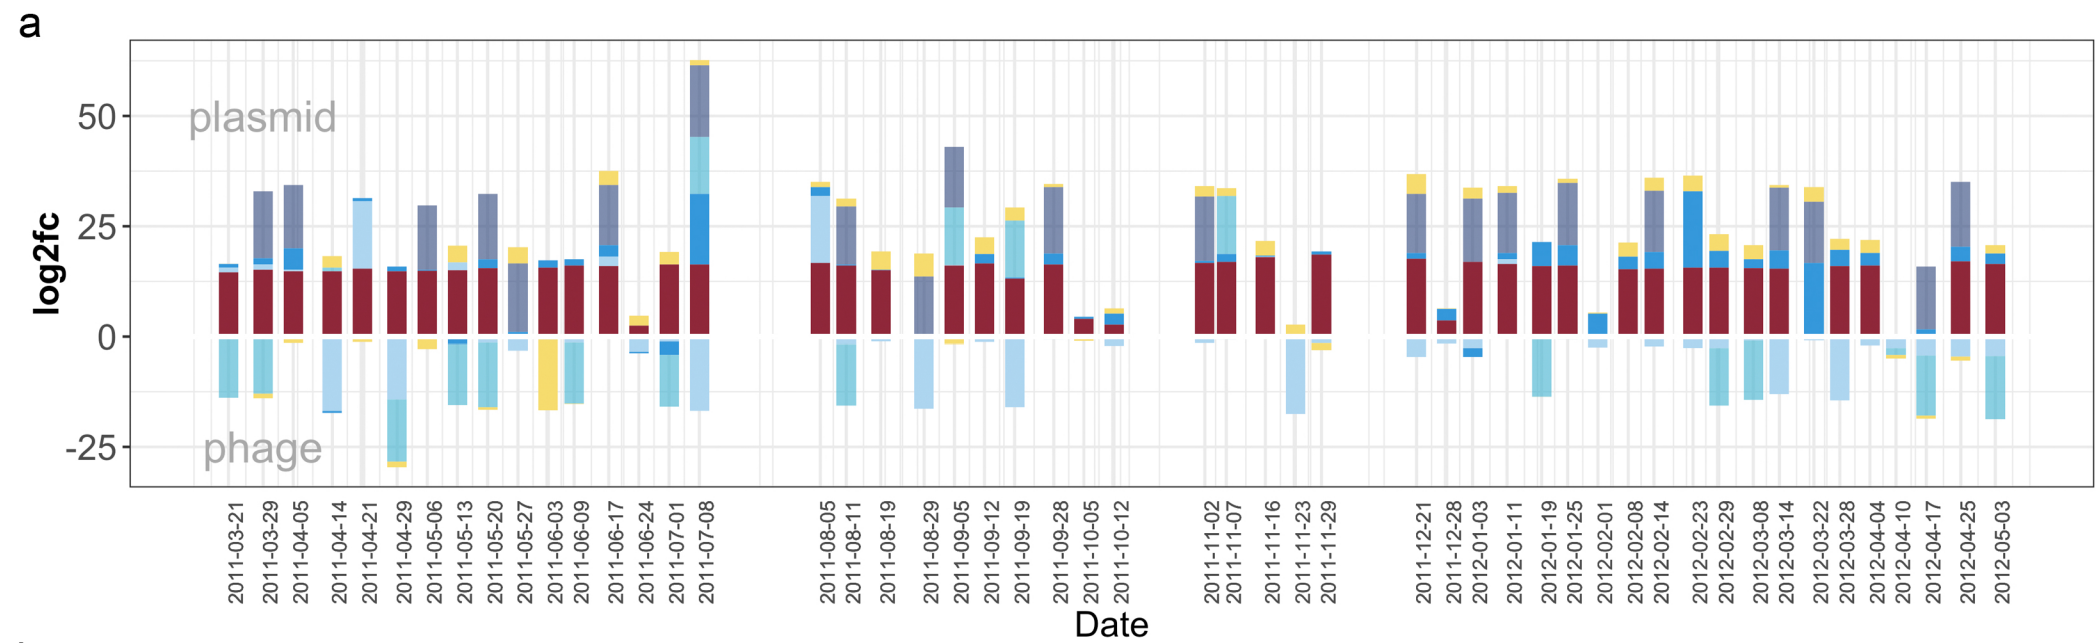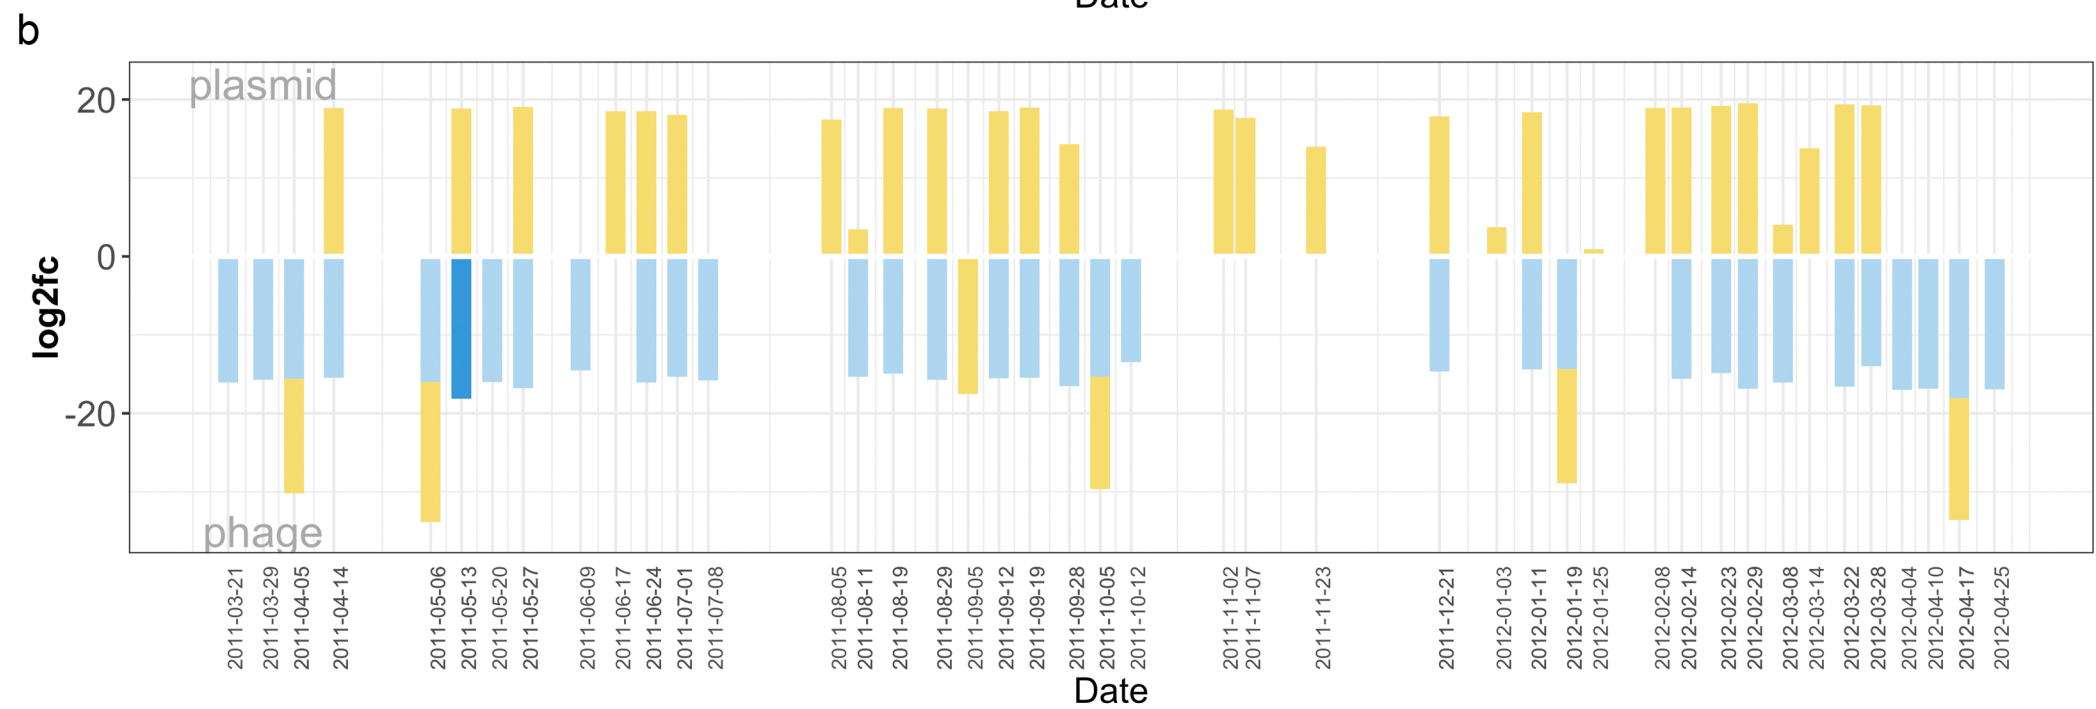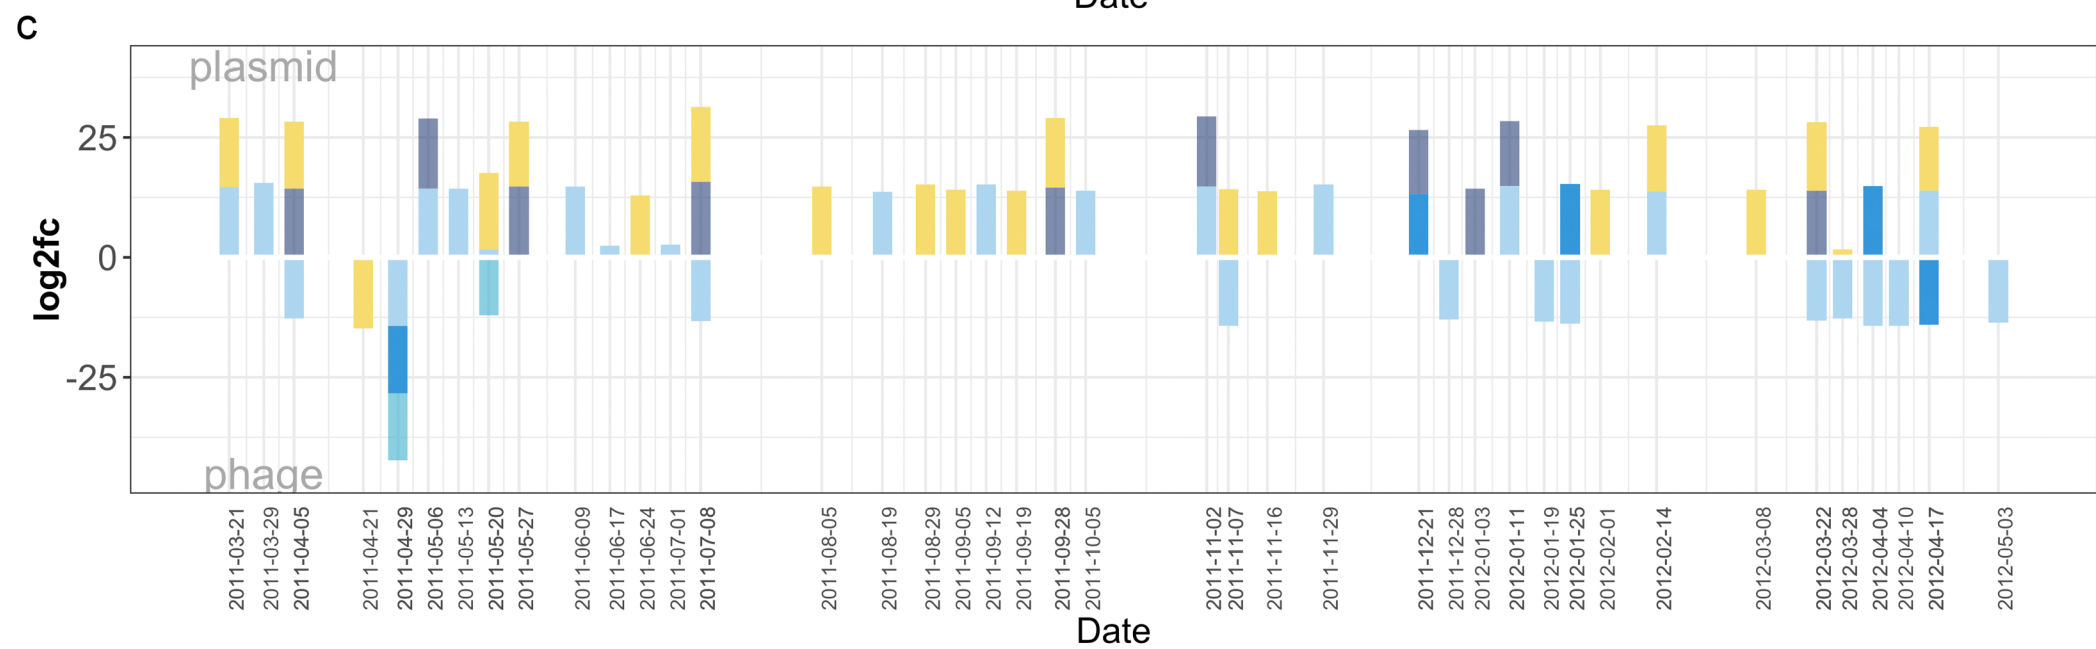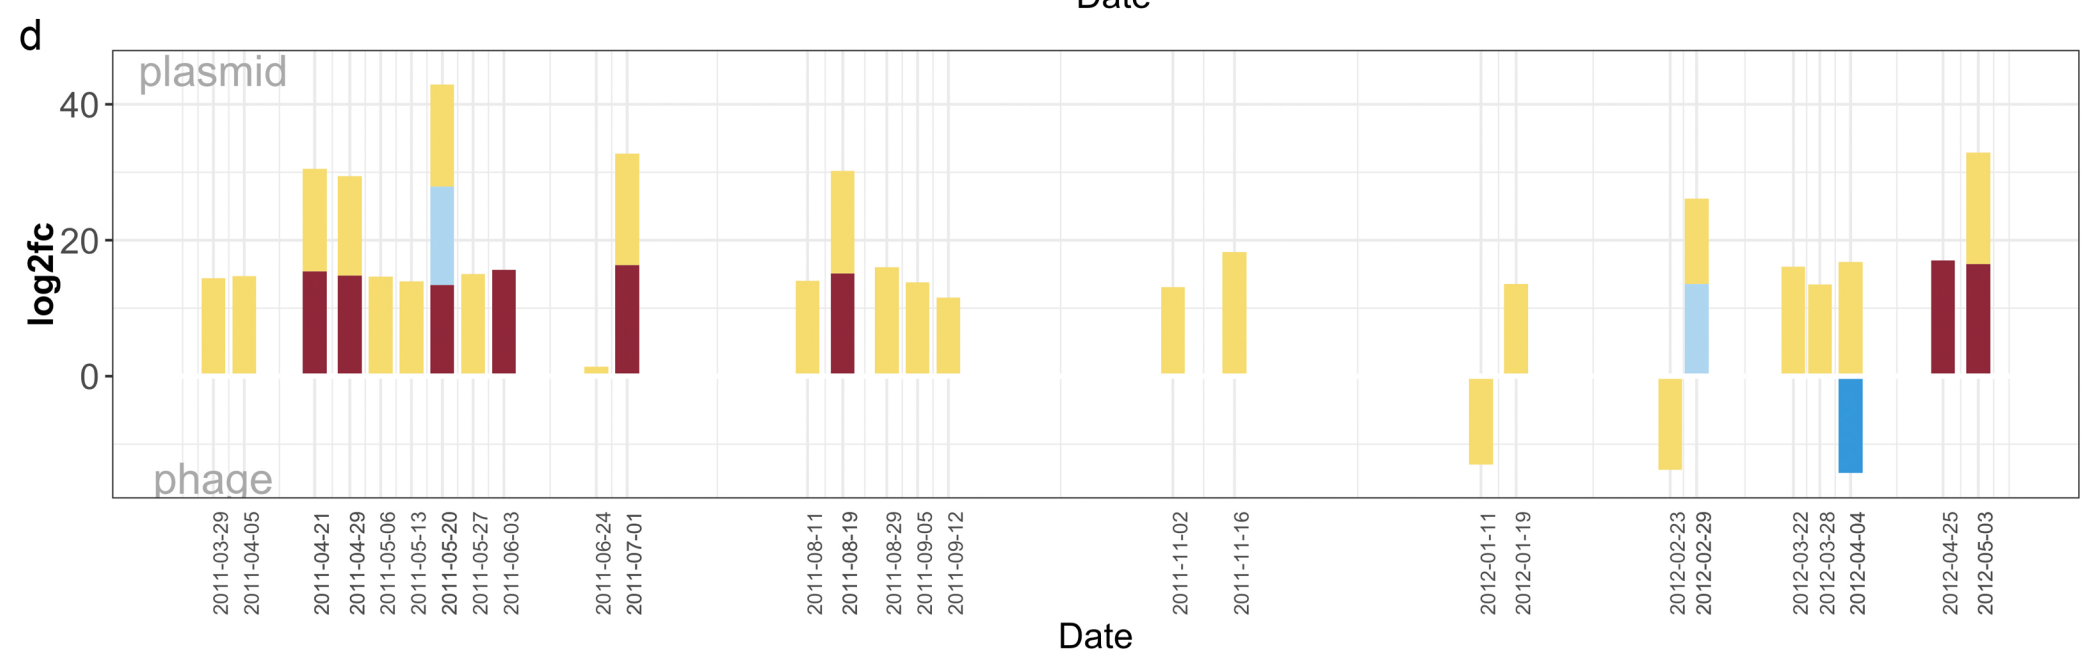

**AMR\_category**

|                |            |             |
|----------------|------------|-------------|
| aminoglycoside | fosfomycin | peptide     |
| bacitracin     | MLS        | sulfonamide |

Supplement: supp [file elife-81196-supp-v1.zip]

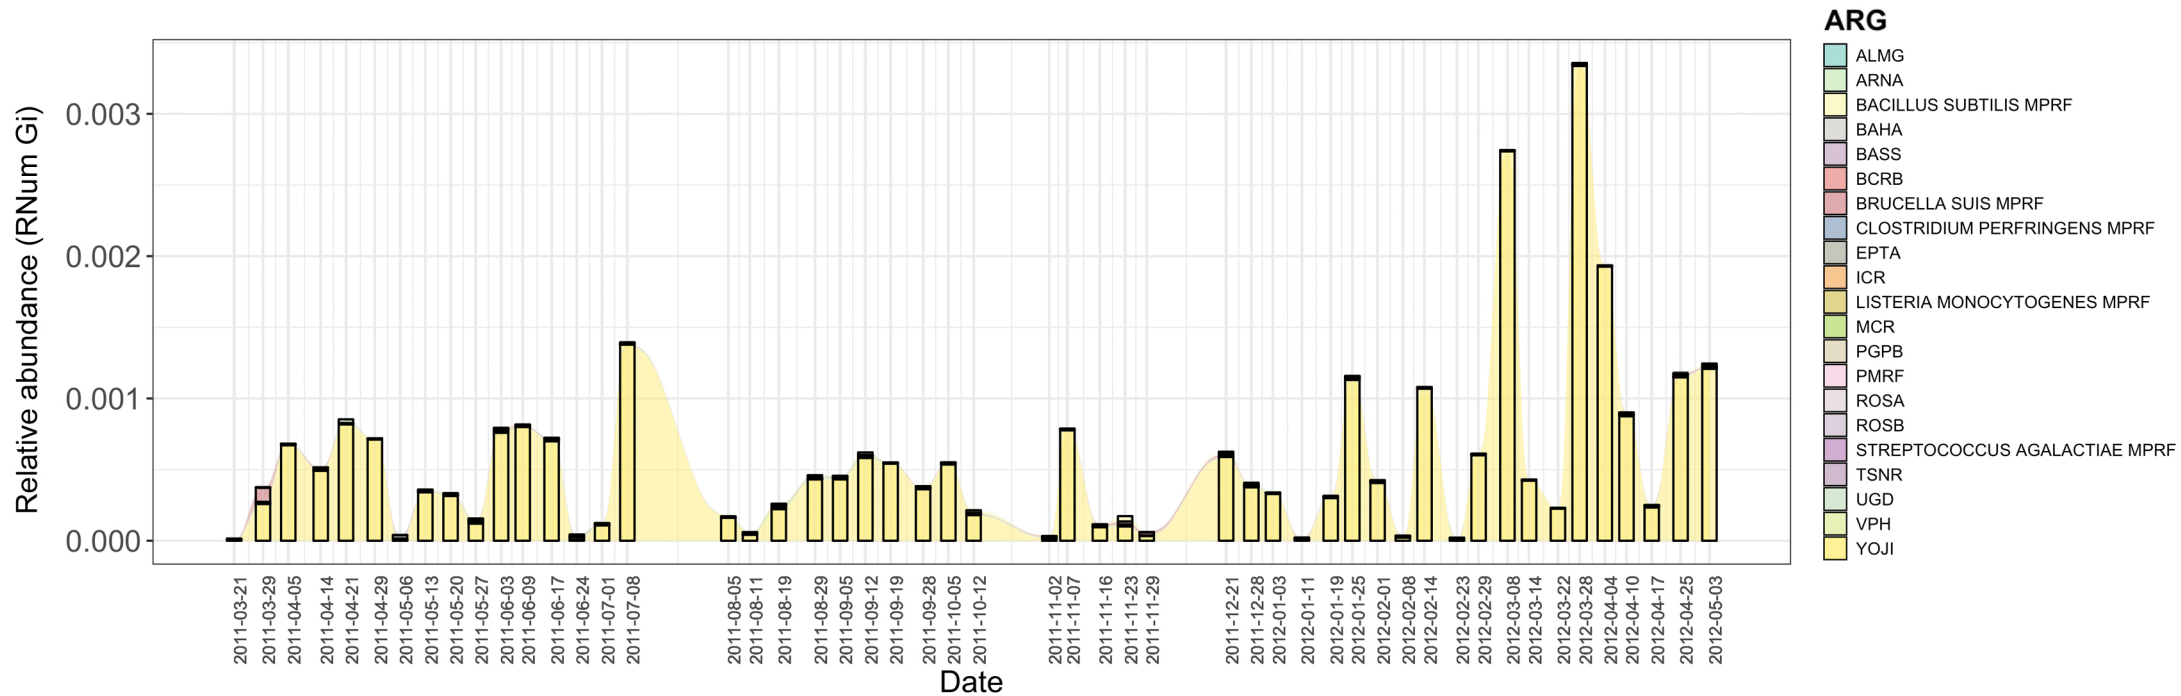

Supplement: supp [file elife-81196-supp-v1.zip]

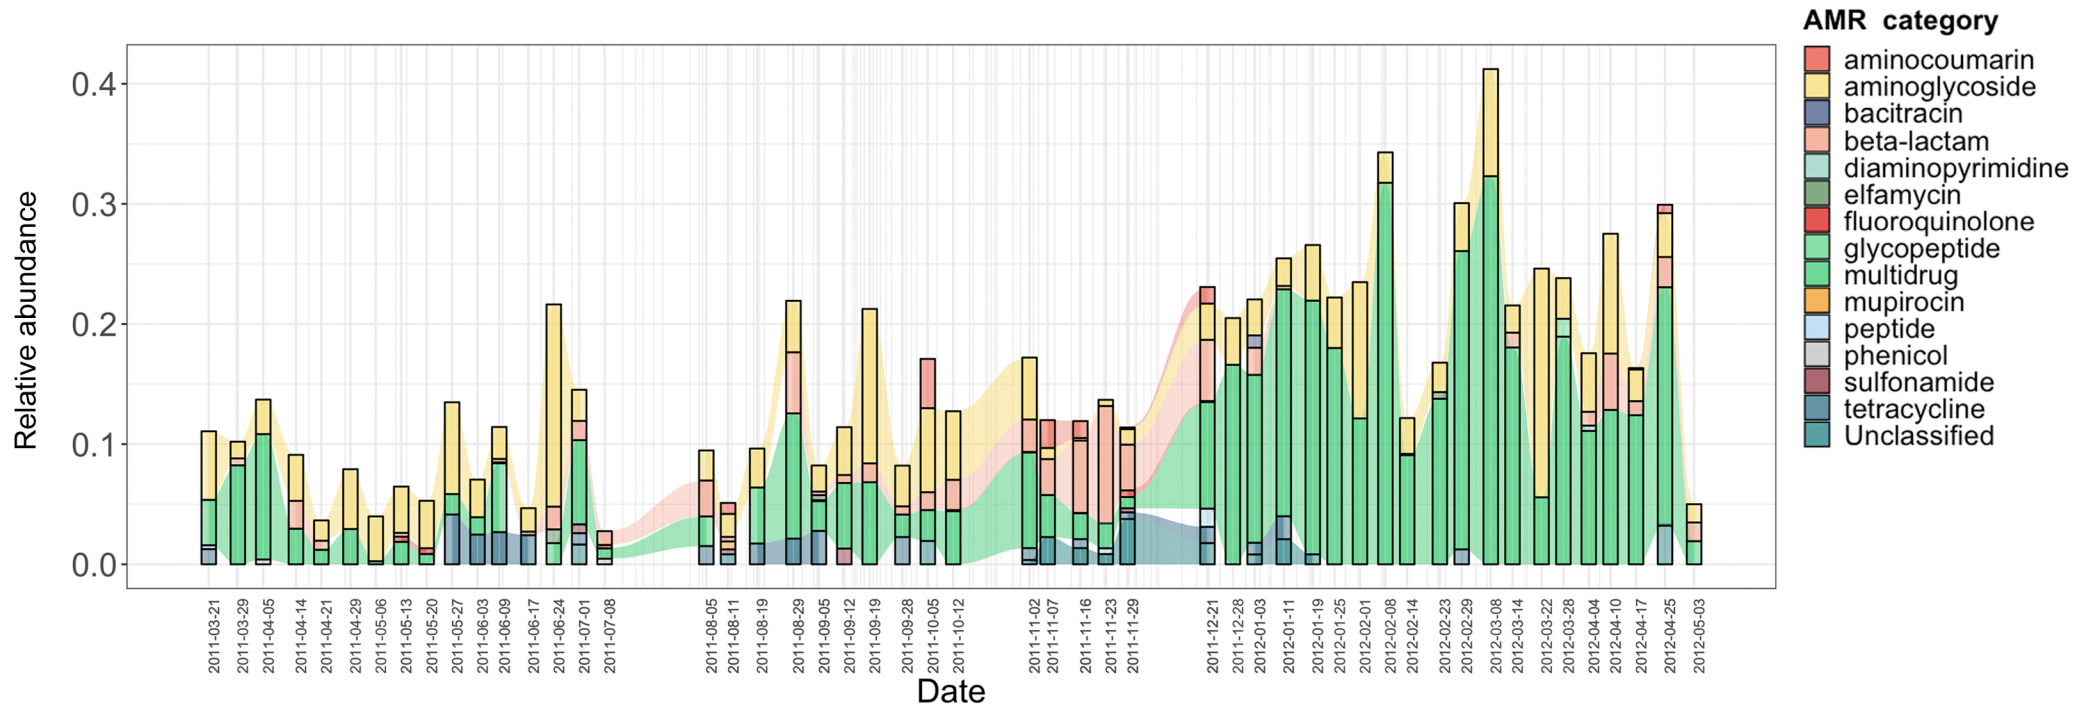

Supplement: supp [file elife-81196-supp-v1.zip]
